# Supplementary material for: Plant-Derived Drug Discovery in an Introductory Biology Laboratory Course
Source: Oxford University Press journal article supplement (doi:10.1525/abt.2021.83.4.214), 2021-04-01
Supplement: abt8304_02_fa_willette_supplemental_material_scientific_oral_presentation_rubric.doc [file abt8304_02_fa_willette_supplemental_material_scientific_oral_presentation_rubric.doc]

**BIOL 111 Fall 2019: PLANT-BASED DRUG DISCOVERY PRESENTATION Topic/title:__________________________________________________________________________**

**Members of Group: __________________________________________________________________**

| **CONTENT CHECKLIST** | **Points** | **Points**  **Possible** |  | **Points** | | **Points**  **Possible** |
| --- | --- | --- | --- | --- | --- | --- |
| **Introduction** | **7 pts** | | **Discussion/Conclusion** | **11 pts** | | |
| 1. Appropriate and informative title |  | 1 | 1. Were predictions confirmed and hypothesis supported or rejected? Why? |  | | 3 |
| 1. Relevant background on group’s specific research topic; based on References Cited |  | 2 | 1. Reasonable explanations of results/outcomes   (evidence from literature)  **Did not focus on ‘error’ -3** |  | | 3 |
| 1. Question you want to answer |  | 1 | 1. How do your results relate to what is known in the literature about this topic? |  | | 3 |
| 1. Hypothesis and corresponding predictions clearly identified |  | 3 | 1. Is there anything that you discovered that you find particularly surprising? Follow-up experiment? |  | | 2 |
| **Materials & Methods** | **7 pts** | | **Presentation style, professionalism, and completeness** | | | **16 pts** |
| 1. Identify the plant(s); picture of plant; description of conditions tested (should include photos) |  | 2 | 1. Overall organization of   presentation, includes References Cited and Acknowledgments | |  | 5 |
| 2. Design of the experiment (should include flow chart); Sample size, dosages, etc. |  | 3 | 1. Presentation style,   timing **(10 min ±1**), and answering questions | |  | 4 |
| 3. Methods used (with purpose) & **Statistical tests** used (why?) |  | 2 | 1. Overall visual appearance   of presentation | |  | 3 |
| **Results** | **9 pts** | | 1. Used reference on slides throughout, list at end.   *(minimum of 4 required)* | |  | 4 |
| 1. Results presented for all types of data collected, in an organized fashion; photographs of assays, etc. |  | 2 | **COMMENTS:** | | | |
| 1. Tables and graphs illustrate data, are informative (with labels), and are formatted appropriately |  | 4 |
| 1. Statistical test results indicated for each type of data; Were they interpreted appropriately? |  | 3 |
| **TOTAL POINTS:** |  | | **50** |
